# Supplementary material for: Massive parallel IGHV gene sequencing reveals a germinal center pathway in origins of human multiple myeloma
Source: PubMed Central journal article supplement (PMC4537010; doi:10.18632/oncotarget.3644), 2015-04-10
Supplement: oncotarget-06-13229-s001.pdf [file oncotarget-06-13229-s001.pdf]

## SUPPLEMENTARY FIGURE AND TABLE

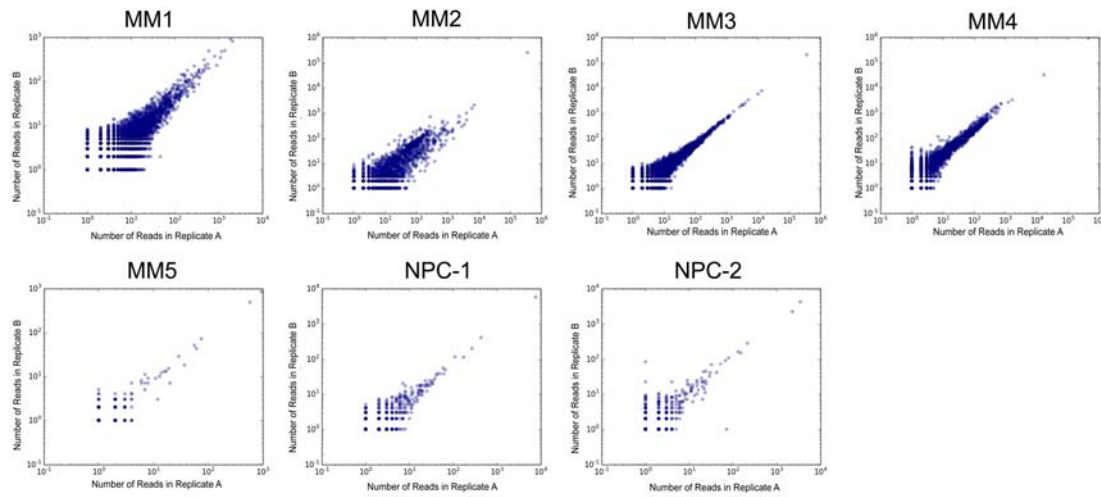

**Supplementary Figure S1: Read counts for all QC-passed full-length *IGHV* gene variant sub-clone sequences that display an identical tumor-derived CDR3 sequence.** The number of reads for each unique sequence in the two technical replicates A and B from each MM and NPC sample are aligned as a XY scatterplot, using a base 10 logarithmic scale.

**Supplementary Table S1. Read counts in MM1-4 showing total reads and proportions of dominant sequence and remaining subclonal variant sequences**

| Case | Total reads | Top Read count | Sum variant reads count* | % Sum variant reads/total reads |
|------|-------------|----------------|--------------------------|---------------------------------|
| MM1  | 1660375     | 2862           | 1657513                  | 99.8                            |
| MM2  | 1232656     | 608012         | 624644                   | 50.7                            |
| MM3  | 1218020     | 571958         | 646062                   | 53.0                            |
| MM4  | 2009338     | 1393460        | 615878                   | 30.7                            |

\*Sum variant reads counts is Total reads minus Top read count
